# Supplementary material for: Development of lignin-coated natural polysaccharide-based nanopesticides for both high foliar adhesion and rapid release of pesticide molecules against bacteriostasis
Source: Royal Society of Chemistry journal article supplement (doi:10.1039/d3en00487b), 2023-01-01
Supplement: d3en00487b1.pdf [file d3en00487b1.pdf]

## Supporting Information

### **Development of lignin-coated natural polysaccharide-based nanopesticides for both high foliar adhesion and rapid release of pesticide molecules against bacteriostasis**

Hanchen Lin, Shanshan Li, Like Ning, Ning Ma, Peng Xu, Mei Hong, Fei Wang,  
Chaoqun You\*

Jiangsu Co-Innovation Centre of Efficient Processing and Utilization of Forest  
Resources; Jiangsu Key Lab for the Chemistry and Utilization of Agro-Forest Biomass;  
College of Chemical Engineering, Nanjing Forestry University, Nanjing 210037, China

\*Corresponding author:

Chaoqun You, College of Chemical Engineering, Nanjing Forestry University, Nanjing  
210037, PR China

E-mail: [chemyoucq@njfu.edu.cn](mailto:chemyoucq@njfu.edu.cn)

Number of pages: 7

Tables: 3

Figures: 9

**Table S1.** Formulation of all tested samples.

| Samples  | Composition |    |    |     |     |
|----------|-------------|----|----|-----|-----|
|          | CS          | MC | SA | LGN | NES |
| CMs      | √           | √  | √  |     |     |
| LCMs     | √           | √  | √  | √   |     |
| NES@CMs  | √           | √  | √  |     | √   |
| NES@LCMs | √           | √  | √  | √   | √   |

**Table S2.** Loading efficiency (LE) of NES@CMs

|        | NES@CMs    | LE in theory (%) |
|--------|------------|------------------|
| LE (%) | 45.66±0.05 | 47.25            |

**Table S3.** Loading efficiency (LE) of NES@LCMs

|        | NES@LCMs   | LE in theory (%) |
|--------|------------|------------------|
| LE (%) | 37.97±0.05 | 39.02            |

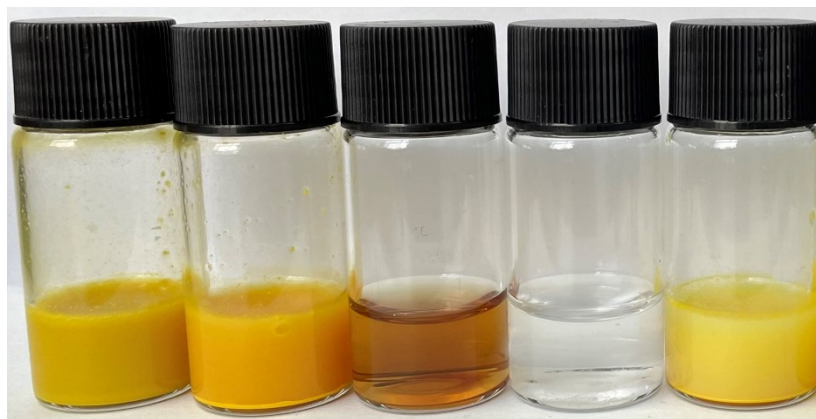

**Figure S1** From left to right, NES@LCMs, NES@CMs, LCMs, CMs, NES  
Sample photos.

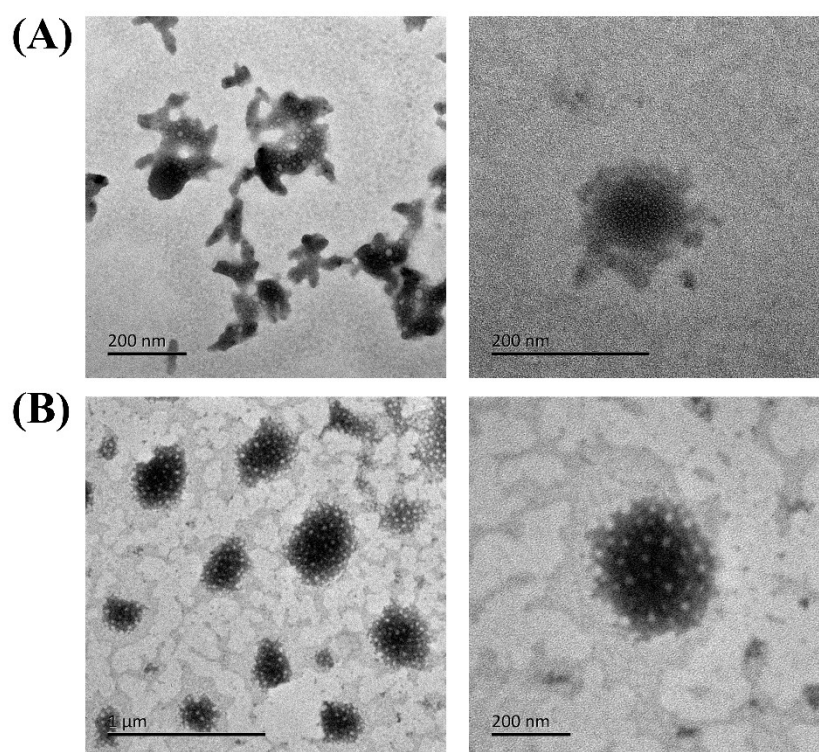

**Figure S2** TEM images of NES@CMs (A), and NES@LCMs (B).

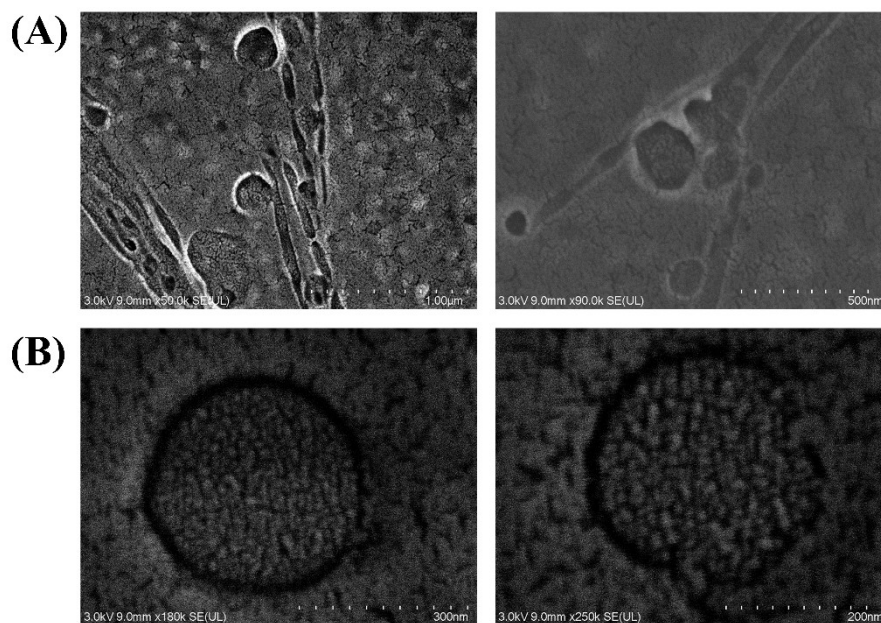

**Figure S3** CF-SEM images of NES@CMs (A), and NES@LCMs (B).

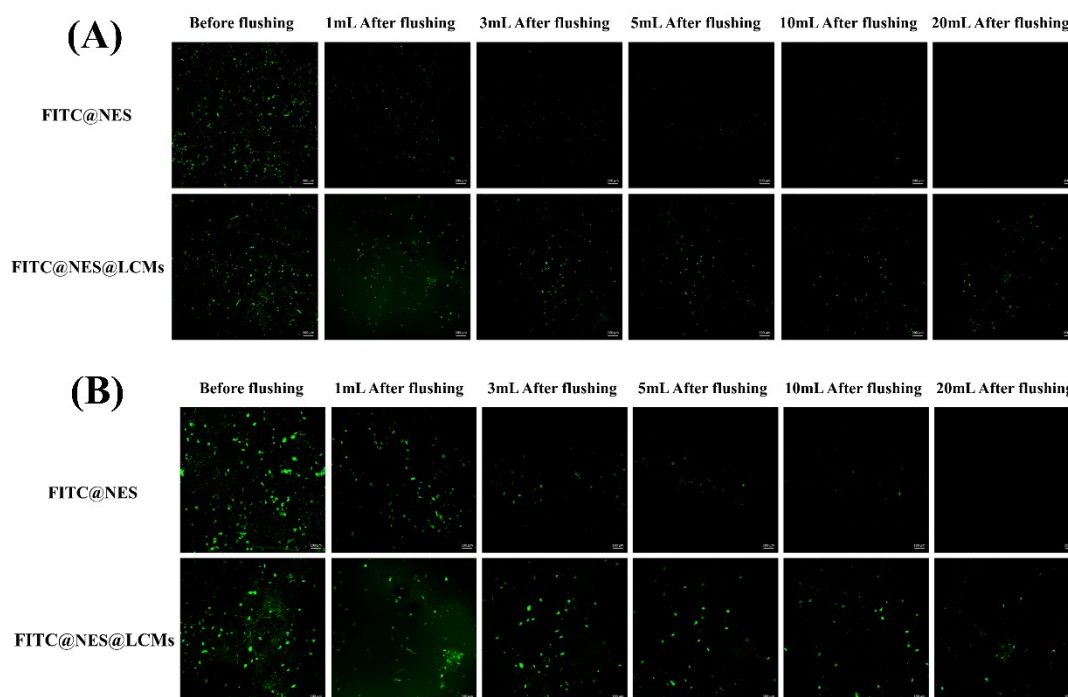

**Figure S4** Images of NES and NES@LCMs taken before and after rinsing with water at 5x (A) and 10x (B) of the microscope.

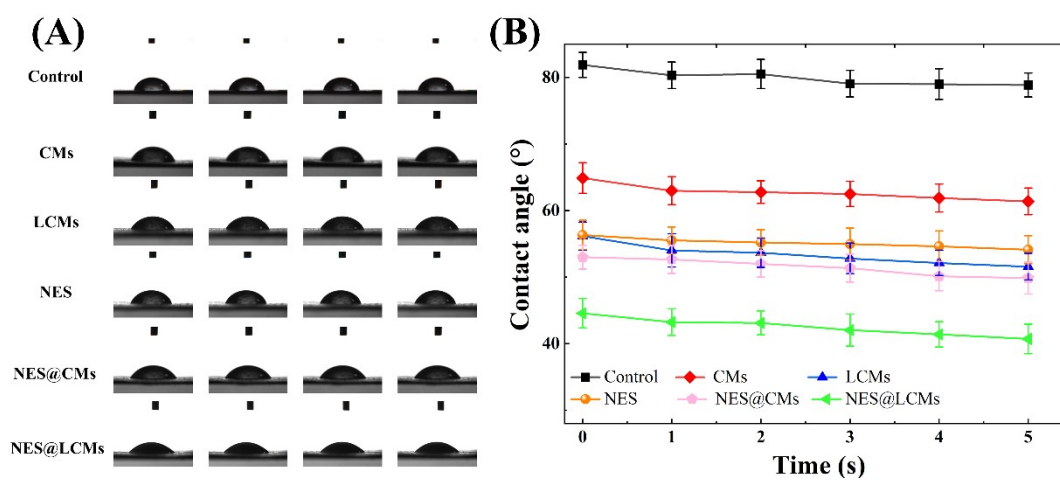

**Figure S5** Contact angle images (A) and values (B) of control, CMs, NES, NES@CMs, and NES@LCMs dispersions on leaves.

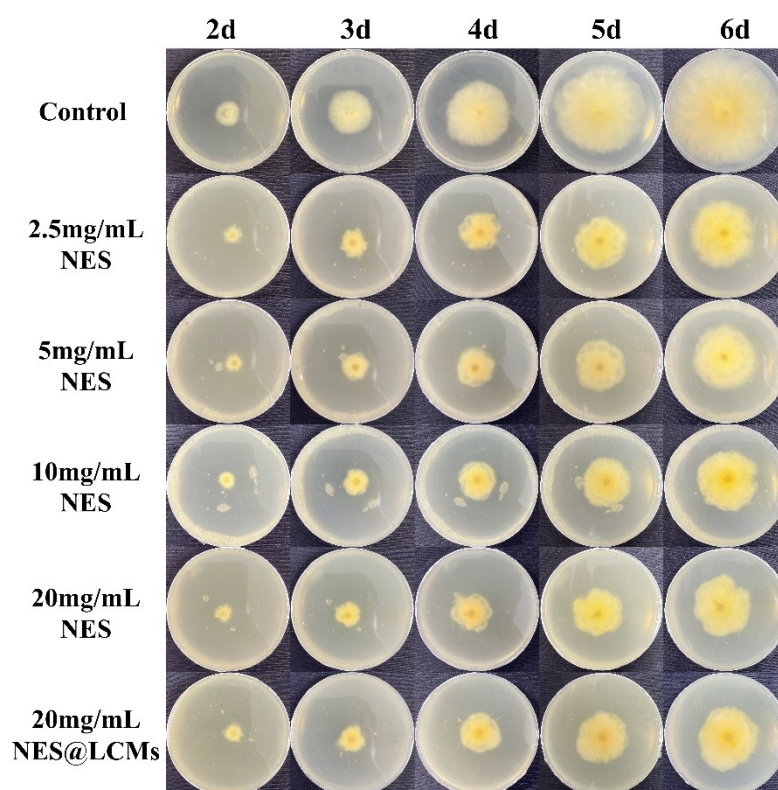

**Figure S6** Images of the antifungal activity of different concentrations of NES and NES@LCMs.

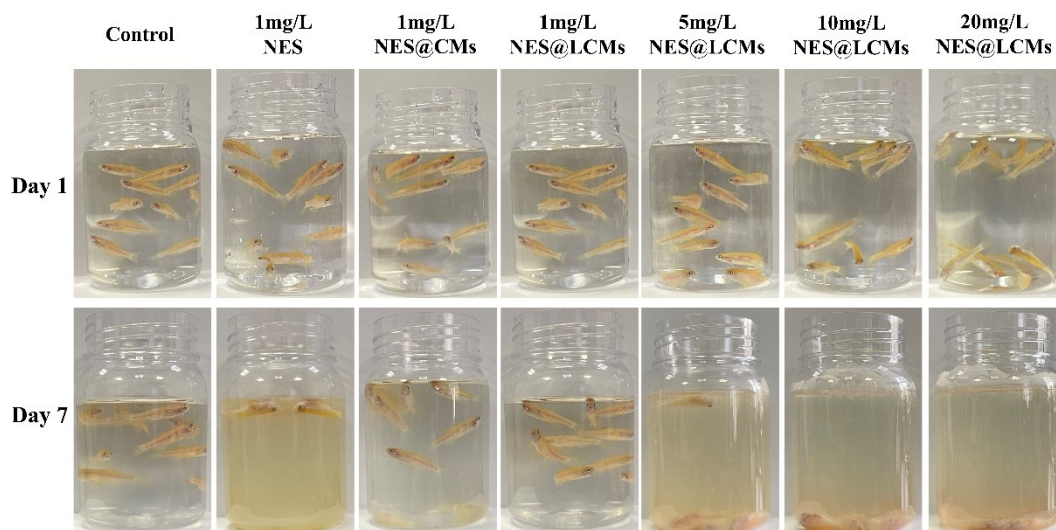

**Figure S7** Comparison of survival pictures of zebrafish treated with NES, NES@CMs, and NES@LCMs.

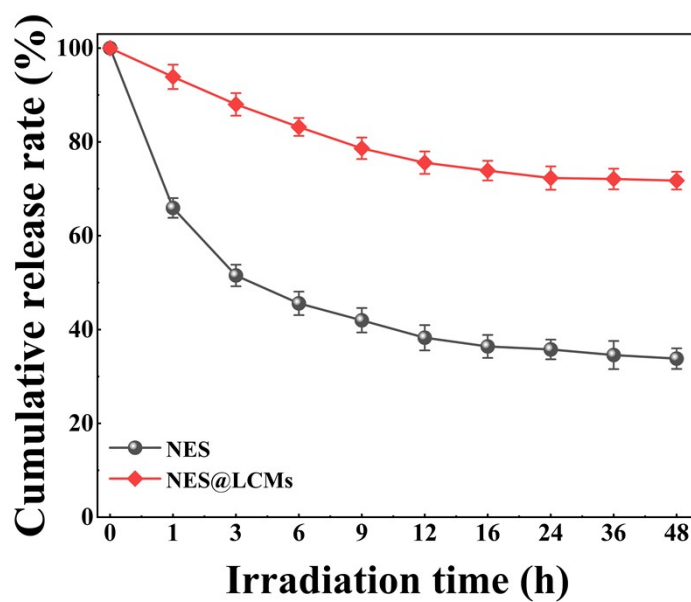

**Figure S8** Comparative change of accumulated NES residue rate with time in NES solution and NES@LCMs after ultraviolet irradiation.

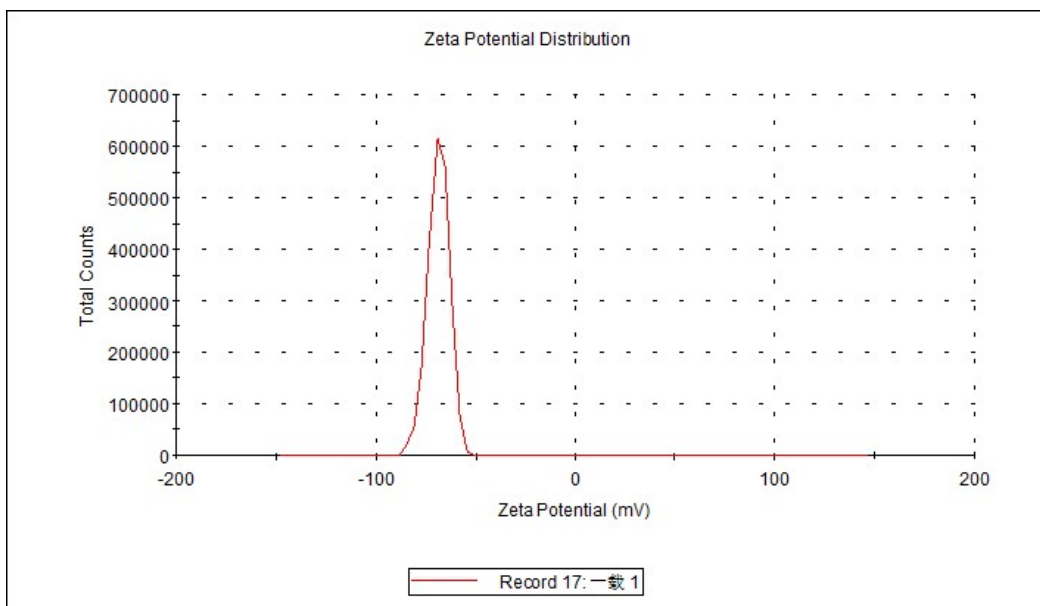

**Figure S9** The zeta potential of NES@LCMs.
